# Supplementary material for: Genome-wide identification of xyloglucan endotransglucosylase/hydrolase gene family members in peanut and their expression profiles during seed germination
Source: PeerJ journal article supplement (doi:10.7717/peerj.13428), 2022-05-17
Supplement: Supplementary_File_5.pdf [file Supplementary_File_5.pdf]

1UN1

|             | 1                         | 10         | 20            |
|-------------|---------------------------|------------|---------------|
| 1UN1        | MAAAYPWTLFLGM             | VMVSG      | TMGAALRKPV    |
| PttXTH16-34 | MAAAYPWTLFLGM             | VMVSG      | TMGAALRKPV    |
| XTH21       | MGSRRVGLTSLVIV            | ASLVS      | AAMCGVPRRPV   |
| XTH51       | MGSRRVGLTSLVVV            | ASLVS      | AAMCGVPRRPV   |
| XTH22       | MGYYSMWSVCCVIL            | WGFVS      | VGICGTPRRPM   |
| XTH52       | MGYYSLWSVCCVIL            | WGFVS      | VGICGTPRRPM   |
| XTH55       | MSSLIFVFL                 | IILYF      | IDGVLARR.SR   |
| XTH56       | MSSLIFVFL                 | IVLFT      | DDGVLVRGGNS   |
| XTH18       | MVRMEAKASSS               | LGVIL      | LLVVI AEA AVS |
| XTH47       | MVRMEAKASSS               | LGVIL      | LLVVI AEA AVS |
| XTH10       | MSKEVSLFLGL               | VMGFV      | FVGVAF A AATA |
| XTH39       | MSKEVSLFLGL               | VMGFV      | FVGVAF A AATA |
| XTH24       | MSKMSSL                   | LGFFV      | GLVLVGVVASS   |
| XTH54       | MSKMSSL                   | LGFFV      | GLVLVGVVASS   |
| XTH2        | MATFYPLIRNGGSLFLIL        | LSWVF      | LVSSLLCVLGR   |
| XTH28       | MATFYPLIRNGGSLFLIL        | LSWVF      | LVSSLLCVLGR   |
| XTH17       | MYMAFFKNPFLL              | LSLWA      | LVLSGVCVWGK   |
| XTH46       | MYMAFFKNPFLL              | LSLWA      | LVLSGVCVWGK   |
| XTH25       | MFLDSQIALFFLIG            | IVSSI      | LFHISVASVVS   |
| XTH57       | MNNFHIALFFLIG             | IVSSI      | LFQISVASVVS   |
| XTH19       | MAAASEKMF                 | LALLF      | IFFMARGI IIV  |
| XTH48       | MAAASEKMF                 | LALLF      | IFFMARGI IIV  |
| XTH40       | MLV                       | ALFIC      | VVVLVGNIVQV   |
| XTH3        | MHIIDHSYTSLGFCFLLSLYTYLPP | IQPNQIKGTI | INMGIEVLIINI  |
| XTH34       | MHIIDHSYTSLGFCFLLSLYTYLPP | IQPNQIKGTI | INMGIEVLIINI  |
| XTH11       | MTLVTKVP                  | IGFSL      | LLIIT IATKAA  |
| XTH41       | MTLVTKVP                  | IGFSL      | LLIIT IATKAA  |
| XTH6        | MAAS                      | TL SYL     | LLIPLLMVVAY   |
| XTH29       | MAAS                      | TL SYL     | LLIPLLMVVAY   |
| XTH35       | MASSSP                    | LLIPL      | LLVGSIMVVAY   |
| XTH30       | MASSKVVV                  | LVVPL      | LVMSFCMVSCW   |
| XTH4        | MAAACVNNNDALIVI           | VITLF      | LIITLPSSSMA   |
| XTH33       | MVASCVNNNDALIVI           | VITLF      | LIITLPSSSMA   |
| XTH5        | MLLPYPTS                  | VVMVA      | LFMTMMMLLC    |
| XTH32       | MLLPYPTS                  | VVMVA      | LFMTMMMLLC    |
| XTH31       | MLLPYPTS                  | VVMVA      | LFMTMMMLLC    |
| XTH14       | MGSTCTNHNGFYVG            | IMVIG      | LVVVTMVGSC    |
| XTH38       | MGSTCTNHNGFYVG            | IMVIG      | LVVVTMVGSC    |
| XTH15       | MGSTCTNHNGFYVG            | IMVIG      | LVVVTMVGSC    |
| XTH44       | MGGFN                     | LVVGV      | VVVVTMVGTC    |
| XTH1        | MAPSWGGS                  | YFLFL      | CMLLGFSTIAY   |
| XTH27       | MAPSWGGS                  | YFLFL      | CMLLGFSTIAY   |

| 1UN1        | α1        | β1       | η1     | β2     | η2       | β3      | β4      | β5       |
|-------------|-----------|----------|--------|--------|----------|---------|---------|----------|
|             | 30        | 40       | 50     | 60     | 70       | 80      |         |          |
| 1UN1        | DVAFGRN   | YVPTWAFD | HIKYFN | GGNE   | IQLH     | LDKYTGT | GFQSKGS | YLFGHFSM |
| PttXTH16-34 | DVAFGRN   | YVPTWAFD | HIKYFN | GGNE   | IQLH     | LDKYTGT | GFQSKGS | YLFGHFSM |
| XTH21       | DVAFGRN   | YVPTWAFD | HIKYFN | GGNE   | IQLH     | LDKYTGT | GFQSKGS | YLFGHFSM |
| XTH51       | DVAFGRN   | YVPTWAFD | HIKYFN | GGSE   | IQLH     | LDKYTGT | GFQSKGS | YLFGHFSM |
| XTH22       | AVPGRN    | YVPTWAFD | HIKYFN | GGSE   | IQLH     | LDKYTGT | GFQSKGS | YLFGHFSM |
| XTH52       | AVPGRN    | YVPTWAFD | HIKYFN | GGSE   | IQLH     | LDKYTGT | GFQSKGS | YLFGHFSM |
| XTH55       | EVSFDQNY  | YVPTWAFD | HIKYFN | GGSE   | IQLH     | LDKYTGT | GFQSKGS | YLFGHFSM |
| XTH56       | EVSFDQNY  | YVPTWAFD | HIKYFN | GGSE   | IQLH     | LDKYTGT | GFQSKGS | YLFGHFSM |
| XTH18       | KGSFEDNF  | FIMWSED  | HFSTSK | DGQI   | IWYLS    | LDKDTG  | CGFTKQR | YRFGWFS  |
| XTH47       | KGSFEDNF  | FIMWSED  | HFSTSK | DGQI   | IWYLS    | LDKDTG  | CGFTKQR | YRFGWFS  |
| XTH10       | KFEELF    | QPSWALD  | HFH    | EGDL   | LKLDNY   | SGAGF   | VSKSKY  | MFPGKVT  |
| XTH39       | KFEELF    | QPSWALD  | HFH    | EGDL   | LKLDNY   | SGAGF   | VSKSKY  | MFPGKVT  |
| XTH24       | KFEELF    | QPSWALD  | HFH    | EGDL   | LKLDNY   | SGAGF   | VSKSKY  | MFPGKVT  |
| XTH54       | KFEELF    | QPSWALD  | HFH    | EGDL   | LKLDNY   | SGAGF   | VSKSKY  | MFPGKVT  |
| XTH2        | PATFEQD   | FRTWSESH | IRHTD  | QGR    | IQLMLDRS | SGCGF   | ASKVKY  | MFGRVSM  |
| XTH28       | PATFEQD   | FRTWSESH | IRHTD  | QGR    | IQLMLDRS | SGCGF   | ASKVKY  | MFGRVSM  |
| XTH17       | PVTFEQD   | FRTWSESH | IRHTD  | QGR    | IQLMLDRS | SGCGF   | ASKVKY  | MFGRVSM  |
| XTH46       | PVTFEQD   | FRTWSESH | IRHTD  | QGR    | IQLMLDRS | SGCGF   | ASKVKY  | MFGRVSM  |
| XTH25       | TGNFNKD   | FYVLWSP  | HVNTSA | DGHT   | RTLKLDQ  | SGAGF   | ASNQMF  | FLFGQID  |
| XTH57       | TGNFNKD   | FYVLWSP  | HVNTSA | DGHT   | RTLKLDQ  | SGAGF   | ASNQMF  | FLFGQID  |
| XTH19       | DANFGKSMY | LTWGTQ   | HASIQG | ED     | LQVLHQT  | SGSAAQ  | TKIP    | FLFGS    |
| XTH48       | DANFGKSMY | LTWGTQ   | HASIQG | ED     | LQVLHQT  | SGSAAQ  | TKIP    | FLFGS    |
| XTH40       | DGNF      | SKSMY    | LTWGTQ | HASIQG | ED       | LQVLHQT | SGSAAQ  | TKIP     |
| XTH3        | AGNFNQD   | FETWGNDR | RAKVLN | NGQL   | LTLSDKA  | SGSGF   | RSRNE   | YLFGKID  |
| XTH34       | AGNFNQD   | FETWGNDR | RAKVLN | NGQL   | LTLSDKA  | SGSGF   | RSRNE   | YLFGKID  |
| XTH11       | AGNFNQD   | FETWGNDR | RAKVLN | NGQL   | LTLSDKA  | SGSGF   | RSRNE   | YLFGKID  |
| XTH41       | AGNFNQD   | FETWGNDR | RAKVLN | NGQL   | LTLSDKA  | SGSGF   | RSRNE   | YLFGKID  |
| XTH6        | AGNLDQE   | FETWGNDR | RAKVLN | NGQL   | LTLSDKA  | SGSGF   | RSRNE   | YLFGKID  |
| XTH29       | AGNLDQE   | FETWGNDR | RAKVLN | NGQL   | LTLSDKA  | SGSGF   | RSRNE   | YLFGKID  |
| XTH35       | GAKLDQE   | FETWGNDR | RAKVLN | NGQL   | LTLSDKA  | SGSGF   | RSRNE   | YLFGKID  |
| XTH30       | GAKLDQE   | FETWGNDR | RAKVLN | NGQL   | LTLSDKA  | SGSGF   | RSRNE   | YLFGKID  |
| XTH4        | GSNFNQD   | FETWGNDR | RAKVLN | NGQL   | LTLSDKA  | SGSGF   | RSRNE   | YLFGKID  |
| XTH33       | GSNFNQD   | FETWGNDR | RAKVLN | NGQL   | LTLSDKA  | SGSGF   | RSRNE   | YLFGKID  |
| XTH5        | GGDLHKNID | ITWGNDR  | RAKVLN | NGQL   | LTLSDKA  | SGSGF   | RSRNE   | YLFGKID  |
| XTH32       | GGDLHKNID | ITWGNDR  | RAKVLN | NGQL   | LTLSDKA  | SGSGF   | RSRNE   | YLFGKID  |
| XTH31       | SQFLDQE   | FETWGNDR | RAKVLN | NGQL   | LTLSDKA  | SGSGF   | RSRNE   | YLFGKID  |
| XTH14       | EGNFNQD   | FETWGNDR | RAKVLN | NGQL   | LTLSDKA  | SGSGF   | RSRNE   | YLFGKID  |
| XTH38       | EGNFNQD   | FETWGNDR | RAKVLN | NGQL   | LTLSDKA  | SGSGF   | RSRNE   | YLFGKID  |
| XTH15       | SANFYDD   | FETWGNDR | RAKVLN | NGQL   | LTLSDKA  | SGSGF   | RSRNE   | YLFGKID  |
| XTH44       | SANFYDD   | FETWGNDR | RAKVLN | NGQL   | LTLSDKA  | SGSGF   | RSRNE   | YLFGKID  |
| XTH1        | GGNFTD    | FLLFGDD  | RVKISD | GGQS   | MSLMDKY  | SGSGV   | ATKDO   | FLFGRF   |
| XTH27       | GGNFTD    | FLLFGDD  | RVKISD | GGQS   | MSLMDKY  | SGSGV   | ATKDO   | FLFGRF   |



$\eta 4$                      $\eta 5$                      $\beta 14$                      $\eta 6$      $\eta 7$   
 $\underline{\underline{22}}$                      $\underline{\underline{222}}$                      $\underline{\underline{220}}$                      $\underline{\underline{240}}$                      $\underline{\underline{250}}$   
 1UN1                     $\underline{\underline{210}}$                      $\underline{\underline{220}}$                      $\underline{\underline{230}}$                      $\underline{\underline{240}}$                      $\underline{\underline{250}}$   
 1UN1    GGLLEKTDWSKAPFIAASYRSFHIDGCEASVEA.....KFCATQG..ARWWDQKEFQ  
 PttXTH16-34 GGLLEKTDWSKAPFIAASYRSFHIDGCEASVEA.....KFCATQG..ARWWDQKEFQ  
 XTH21    GGLLEKTDWSKAPFIAASYKGFHIDGCEASVEA.....KFCSTQG..KRWWDQQEFR  
 XTH51    GGLLEKTDWSKAPFIAASYKGFHIDGCEASVEA.....KFCSTQG..KRWWDQQEFR  
 XTH22    GGLLEKTDWSKAPFIAASYKGFHIDGCEASVEA.....KFCSTQG..KRWWDQQEFR  
 XTH52    GGLLEKTDWSKAPFIAASYKGFHIDGCEASVEA.....KFCSTQG..KRWWDQQEFR  
 XTH55    GGRRTKINWNSAPFKAYFQGFVDVKGCEVLQDS.....SDIQHCASHKYQWNTPSFW  
 XTH56    GGRRTKINWNSAPFKAYFQGFVDVKGCEVLQDS.....SDIQHCSDSKYQWNTPSFW  
 XTH18    GGLLEKTNWKLAPFVSSYKDFSVDDGQWKDP.....YPACVSTTTDNWWDQYSAW  
 XTH47    GGLLEKTNWKLAPFVSSYKDFSVDDGQWKDP.....YPACVSTTTDNWWDQYSAW  
 XTH10    GGRVKTNWSHAPFIAATYKAFEINGCECPVSSSTS...VENLKRCSSE.KKYWWDDEPNLG  
 XTH39    GGRVKTNWSHAPFIAATYKAFEINACECPVSSSTS...VENLKRCSSE.KKYWWDDEPNLG  
 XTH24    GGRVKTDWSHAPFVATYKDFITIDACECPVGVSSSSVAPENAKRCSSEDDKYYWDEPTMS  
 XTH54    GGRVKTDWSHAPFVATYKDFITIDACECPVGVSSSSVAPENAKRCSSEDDKYYWDEPTMS  
 XTH2    GGLLEKIDWSKAPFNAYYKDFDIEGCSVPGPA.....SCASNPSNWWEGAAAYQ  
 XTH28    GGLLEKIDWSKAPFNAYYKDFDIEGCSVPGPA.....SCASNPSNWWEGAAAYQ  
 XTH17    GGLLEKIDWRKAPFYAYYKDFDIEGQPLGPT.....SCASNASNWWEGAAAYQ  
 XTH46    GGLLEKIDWRKAPFYAYYKDFDIEGQPLGPT.....SCASNASNWWEGAAAYQ  
 XTH25    GGQDKIDWTKGGPIASFRNYYNIDACVWKGNP.....RFCRVASHVNWNWLNNSF  
 XTH57    GGQDKIDWTKGGPIASFRNYYNIDACVWKGNP.....RFCRVASHVNWNWLNNSF  
 XTH19    GGLVKTNWNTNAPFIARLNRFARARACKWNGPISIN.....NCASNVPNSNWTSPYIK  
 XTH48    GGLVKTNWNTNAPFIARLNRFARARACKWNGPISIN.....NCASNVPNSNWTSPYIK  
 XTH40    GGLVKTDWRGAPFIAFHFRARARACKWNGAVSIN.....HCASNVPANWWSPLYK  
 XTH3    GGLVKTDWTQAPFTAASYKGFNAQAQCVWSSSSGSSCSKQ.....GQSWFTQ  
 XTH34    GGLVKTDWTQAPFTAASYKGFNAQAQCVWSSSSGSSCSKQ.....GQSWFTQ  
 XTH11    GGLVKTDWAHAPFTAAYRNFNAPP.....AQSWMGQ  
 XTH41    GGLVKTDWAHAPFTAAYRNFNAPP.....AQSWMGQ  
 XTH6    GGLVKTDWTKAPFTAAYRNFNADACIWSNGASSCGSGSG...SSS.....TSSSWLSQ  
 XTH29    GGLVKTDWTNAPFTAAYRNFNADACIWSNGASSCGSGSG...SSS.....TSSSWLSQ  
 XTH35    GGLVKTDWTKAPFTAAYRNFNADACIWSNGASSCGSGSG...LGSSTT...SSSWLSQ  
 XTH30    GGLVKTDWSKAPFTAAYRNFNANNACIWKNGRSSCKS.....SSSWLSQ  
 XTH4    GGLVKTDWSQAPFTAAYRNFNANNACIWSNGVSSCNLSSSN...SSSN.....NNSWLSQ  
 XTH33    GGLVKTDWSQAPFTAAYRNFNANNACIWSNGVSSCNLSS.N...SSDN.....NNSWLSQ  
 XTH5    SGLIKTNWSAAPFIAYFKNFVFNACVESTPPSITSSCTHP...NKKSNHNSVGEKWITQ  
 XTH32    GGVIKTNWSAAPFIAYFKNFVFNACVESTPPSIKSSCTHL...NKKNNHNSVGEKWITQ  
 XTH31    .....  
 XTH14    GGLVKTDWAKAPFTAAYRNFRAATQLSSASLRPNTRSSSEWE...TS.....  
 XTH38    GGLVKTDWAKAPFTAAYRNFRAATQLSSASLRPNTRSSSEWE...TS.....  
 XTH15    GGLVKTDWSKAPFTAAYRNFKATAFSATSAFSDVATSEIQ...NSGK.....DS  
 XTH44    GGLVKTDWSKAPFTAAYRNFKATAFSATSAFSNVVTSEIQ...GSGE.....DS  
 XTH1    WGVVKIDLSQAPFIARFKNYNGTACVPPKGIADCKG.....FGASMKR  
 XTH27    WGVVKIDLSQAPFIARFKNYNGTACVPPKGIADCKG.....FGASMKK

$\alpha 2$                      $\beta 15$                      $\eta 8$                      $\alpha 3$   
 $\underline{\underline{00000000000000}}$                      $\underline{\underline{000}}$   
 $\underline{\underline{260}}$                      $\underline{\underline{270}}$                      $\underline{\underline{280}}$                      $\underline{\underline{290}}$   
 1UN1                     $\underline{\underline{260}}$                      $\underline{\underline{270}}$                      $\underline{\underline{280}}$                      $\underline{\underline{290}}$   
 1UN1    DLDADFQYRRLSWVVRQKYTIYNYCTDRSRYP SMPPECKRDRDI.....  
 PttXTH16-34 DLDADFQYRRLSWVVRQKYTIYNYCTDRSRYP SMPPECKRDRDI.....  
 XTH21    DLDALQWRRLRWVVRQKFTIYNYCNDRRYPTLPPECSRDRDI.....  
 XTH51    DLDALQWRRLRWVVRQKFTIYNYCNDRRYPTLPPECSRDRDI.....  
 XTH22    DLDYQWRRLRWVRRRFTIYNYCSDRTRYQPMPPECRRTNGDY.....  
 XTH52    DLDYQWRRLRWVRRRFTIYNYCSDRTRYQPMPPECRRTNGDY.....  
 XTH55    QLDPVRQRQYENVKTRYMIYDYCTDRKRNFTPPELCOQ.....  
 XTH56    QLDPVRQRQYEDVKTRYMIYDYCTDRKRNFTPPELCOQ.....  
 XTH18    HLSDDQKKDYAVWRNRLVIYDYCNDSERYPTLPEECSLSPWD.....  
 XTH47    HLSDDQKKDYAVWRNRLVIYDYCNDSERYPTLPEECSLSPWD.....  
 XTH10    VLSLHQSHQLMWRRAKHMVYDYCADTARFFVMPAECVHSHHKLVLKN.....  
 XTH39    VLSLHQSHQLMWRRAKHMVYDYCADTARFFVMPAECVHSHHKLVLKN.....  
 XTH24    ELNVHQSHQLMWRANHMVYDYCTDTARFFVTPAECVHHR.....  
 XTH54    ELNVHQSHQLMWRANHMVYDYCTDTARFFVTPAECVHHR.....  
 XTH2    ELSAIQARRYRWRINHVYDYCQDKSRFFHFALMFVGKKPNMEEHKRI.....  
 XTH28    ELSAIQARRYRWRINHVYDYCQDKSRFFVTPPECLAGI.....  
 XTH17    ALTPQARLYRWRINHIYDYCQDKRFFLGPPECLS.....  
 XTH46    ALTPQARLYRWRINHIYDYCQDKRFFLGPPECLS.....  
 XTH25    TLTSPORRWFKWRKYHMIYDYCQDNERFQNNLPQEWSLPKY.....  
 XTH57    TLTSPORRWFKWRKYHMIYDYCQDNERFQNNLPQEWSLPKY.....  
 XTH19    QLSYAQMGLYWRNRYMIYDYCKDTKRFNGQSSDFVI.....  
 XTH48    QLSYAQMGLYWRNRYMIYDYCKDTKRFNGQVPPECFKTF.....  
 XTH40    QLSYSEKGLYWRNRYMIYDYCADSKRFNGQLPPECSKTQL.....  
 XTH3    SLDSGTQARIQWVQKNYMIYNYCTDTKRFQGLPECTLA.....  
 XTH34    SLDSGTQARIQWVQKNYMIYNYCTDTKRFQGLPECTLA.....  
 XTH11    SLDSGTGLARIHVVQKNYMIYNYCTDLKRFQGPPECSLA.....  
 XTH41    SLDSGTGLARIHVVQKNYMIYNYCTDLKRFQGPPECSLA.....  
 XTH6    ELDTTAQERLRWVQKNYMIYNYCTDAKRFQGPPECRTS.....  
 XTH29    ELDTTAQERLRWVQKNYMIYNYCTDAKRFQGPPECRTS.....  
 XTH35    ELDTTAQERLRWVQKNYMIYNYCTDAKRFQGPPECRTS.....  
 XTH30    ELDSGLQRLRWVQKNYMIYNYCTDKKRFGRFPIECNRS.....  
 XTH4    QLDSNGQRKLRWVQKNYMIYNYCSDINRFFQGLPLECTLRIT.....  
 XTH33    QLDSNGQRKLRWVQKNYMIYNYCSDINRFFQGLPLECTLRIT.....  
 XTH5    GLKPSVVDKLNWVHKNFIVYNYCSDLKRFFQGLPLECIPVQKEKLLDQEFDITWGDGRA  
 XTH32    ELKPSVVDKLNWVHKNFIVYNYCSDLKRFFQGLPLECKIN.....  
 XTH31    .....  
 XTH14    DIDAI GRRRLRWVQKYFMIYNYCNDFKRFFQGLPAECRSRF.....  
 XTH38    DIDAVGRRRLRWVQKYFMIYNYCNDFKRFFQGLPAECRSRF.....  
 XTH15    VLDAYGRRRLRWVQKYFVVYNYCNDLKRFFEGIPAECSHGRF.....  
 XTH44    VLDAYGRRRLRWVQKYFVVYNYCNDPKRFFQGIPEACSHGRF.....  
 XTH1    GLDNENKKKLRQVNSKWVVYHYCRDLRXYAHLGPFECRRDNMAHSDNNQ.....  
 XTH27    GLDNENKKKLRQVNSKWVVYHYCRDLRXYAHLGPFECRRDNMAHSDNNQ.....

1UN1

1UN1 .....  
PttXTH16-34 .....  
XTH21 .....  
XTH51 .....  
XTH22 .....  
XTH52 .....  
XTH55 .....  
XTH56 .....  
XTH18 .....  
XTH47 .....  
XTH10 .....  
XTH39 .....  
XTH24 .....  
XTH54 .....  
XTH2 .....  
XTH28 .....  
XTH17 .....  
XTH46 .....  
XTH25 .....  
XTH57 .....  
XTH19 .....  
XTH48 .....  
XTH40 .....  
XTH3 .....  
XTH34 .....  
XTH11 .....  
XTH41 .....  
XTH6 .....  
XTH29 .....  
XTH35 .....  
XTH30 .....  
XTH4 .....  
XTH33 .....  
XTH5 KMLNNGELLTSLDKASC SGFQSKNEFLFGKIDMQLKLVPGNSLSSKGSNWDEIDFEFLG  
XTH32 .....  
XTH31 .....  
XTH14 .....  
XTH38 .....  
XTH15 .....  
XTH44 .....  
XTH1 .....  
XTH27 .....

1UN1

1UN1 .....  
PttXTH16-34 .....  
XTH21 .....  
XTH51 .....  
XTH22 .....  
XTH52 .....  
XTH55 .....  
XTH56 .....  
XTH18 .....  
XTH47 .....  
XTH10 .....  
XTH39 .....  
XTH24 .....  
XTH54 .....  
XTH2 .....  
XTH28 .....  
XTH17 .....  
XTH46 .....  
XTH25 .....  
XTH57 .....  
XTH19 .....  
XTH48 .....  
XTH40 .....  
XTH3 .....  
XTH34 .....  
XTH11 .....  
XTH41 .....  
XTH6 .....  
XTH29 .....  
XTH35 .....  
XTH30 .....  
XTH4 .....  
XTH33 .....  
XTH5 NVSGEPYILHTNVFSNGKGNTEQQFYLFWDPSADFHHTYSILWNPQRIMFSVDS SPIREFK  
XTH32 .....  
XTH31 .....  
XTH14 .....  
XTH38 .....  
XTH15 .....  
XTH44 .....  
XTH1 .....  
XTH27 .....

**1UN1**

```
1UN1
PttXTH16-34 .....
XTH21 .....
XTH51 .....
XTH22 .....
XTH52 .....
XTH55 .....
XTH56 .....
XTH18 .....
XTH47 .....
XTH10 .....
XTH39 .....
XTH24 .....
XTH54 .....
XTH2 .....
XTH28 .....
XTH17 .....
XTH46 .....
XTH25 .....
XTH57 .....
XTH19 .....
XTH48 .....
XTH40 .....
XTH3 .....
XTH34 .....
XTH11 .....
XTH41 .....
XTH6 .....
XTH29 .....
XTH35 .....
XTH30 .....
XTH4 .....
XTH33 .....
XTH5 NMNQTEFHQSRSQ
XTH32 .....
XTH31 .....
XTH14 .....
XTH38 .....
XTH15 .....
XTH44 .....
XTH1 .....
XTH27 .....
```

**Supplementary Files 5 The multiple alignment of amino acid sequences among 58 AhXTHs in peanut and 1UN1**

Amino acid sequences from 58 AhXTHs in peanut were aligned using PttXET16-34 (1UN1) as a referent sequence by MEGA X, and their secondary structures were predicted using ESPript. The conserved residues were shown in blue frames.
