# Supplementary material for: Genome-wide identification of xyloglucan endotransglucosylase/hydrolase gene family members in peanut and their expression profiles during seed germination
Source: PeerJ journal article supplement (doi:10.7717/peerj.13428), 2022-05-17
Supplement: Supplementary_File_6.pdf [file Supplementary_File_6.pdf]

2UWA  $\eta_1$   $\alpha_1$   $\beta_1$

1 10 20 30 40 50

```

2UWA .....MPPNILSIFLHLLPILMFSSSCLGQGGPPSPGYYPSSQITSLGFDOGYTNLW
TmNXG1 .....MPPNILSIFLHLLPILMFSSSCLGQGGPPSPGYYPSSQITSLGFDOGYTNLW
XTH8 .....MMKALLLFLFAISSSLFMPCYSSSGYWPPSPGYWPHKFRSMNFKYGFRLNW
XTH9 .MFTTMLPSSPLSFFFFFLVLSFMICASAQ..GPPSPGYYPGSKISPISFDQGFRLNW
XTH20 .....MALFVFAILMLMAPSSNAEWPPSPGYWPHKFRSMNFKYGFRLNW
XTH23 .....MPSLLSSSLQMLPFLFSLIISLMLCGIADSPSPGYYPSSQVSSVAFDQAYRNLW
XTH37 .....MMKALLLFLFAISSSLFMPCYSSSGYWPPSPGYWPHKFRSMNFKYGFRLNW
XTH49 .....MMMKALLLFLFAISSSLFMPCYSSSGYWPPSPGYWPHKFRSMNFKYGFRLNW
XTH50 .....MLMAPSSNAEWPPSPGYWPHKFRSMNFKYGFRLNW
XTH53 .....MPSLLSSSLQMLPFLFSLIISLMLCGIADSPSPGYYPSSQVSSVAFDQAYRNLW
XTH7 .....MADPVLHFDTTNPLHHHQTOPLKEIAIDY
XTH12 .....MALIWQLKLLFSPLLIILLAN.VVSSRTRPFTAPTVTPLNSFPRVPIIDPFSNAP
XTH13 .....MGLGGGLVTFPCLLLFFAASPASSTNLLPIIPFDEGYAPLF
XTH16 MDHNNTLRRFGEIIPKTRHNHNFLLSLFLFFFSSHAAFDLATIPFNDGYSPLF
XTH26 .....MGGCHLCFLFLCLSSAMVVVSGSSSMNLLPIIAFEDGYTPLF
XTH36 .....MADPVLHFDTTNPLHHHQTOPLKEIAIDY
XTH42 .....MALIWQLNLLFSPLLIICLLSNVSSRTRPFTAPTVTPLNSFPRVPIIDPFSNAP
XTH43 .....MGLGGGLVTFPCLLLFFAASPASSTNLLPIIPFDEGYAPLF
XTH45 MDHNNTLRRFGEIIPKTRHNHNFLLSLFLFFFSSHAAFDLATIPFNDGYSPLF
XTH58 .....MGGCHVCFLFLCLSSAMVVVSGSSSMNLLPIIAFEDGYTPLF

```

2UWA  $\eta_2$   $\beta_2$   $\beta_3$   $\beta_4$   $\beta_5$

60 70 80 90 100

```

2UWA GPQHQRVDQ.G.SLTIWLDSTSGSGFKSINRYRSGYFGANIKLQSGYTAGVITSFYLSNN
TmNXG1 GPQHQRVDQ.G.SLTIWLDSTSGSGFKSINRYRSGYFGANIKLQSGYTAGVITSFYLSNN
XTH8 GPQHQRVDQ.G.SLTIWLDSTSGSGFKSINRYRSGYFGANIKLQSGYTAGVITSFYLSNN
XTH9 GPQHQRLEQG..LTSIWLDSTSGSGFKSLHYSYQSGYFGASAIKLPQGYTAGVITTLYLSNN
XTH20 GPQHQRLEQGN..ALTIWLDSTSGSGFKSVAPFRSGYFGASAIKLPQGYTAGVITAFYLSNN
XTH23 GPQHQRLDQSG.SLTIWLDSTSGSGFKSIRPYRSGYFGAAIKLQSGYTAGVITTLYLSNN
XTH37 GPQHQRLDQSG.SLTIWLDSTSGSGFKSIRPYRSGYFGAAIKLQSGYTAGVITTLYLSNN
XTH49 GPQHQRLDQSG.SLTIWLDSTSGSGFKSIRPYRSGYFGAAIKLQSGYTAGVITTLYLSNN
XTH50 .....MADPVLHFDTTNPLHHHQTOPLKEIAIDY
XTH53 GPQHQRLEQGN..ALTIWLDSTSGSGFKSVAPFRSGYFGASAIKLPQGYTAGVITAFYLSNN
XTH7 TPEACSHCPNSNTITLTFDHRGARGWRTRTFHYGTFSLSIQCPKNTNGLNFNLYLSSSL
XTH12 GASNIKLLANGTMATLADKLSGSGLVSKSSYYGFSAAIKLPAGISSGVVAFYLSNA
XTH13 DNNLVIHRDGKTVHLSLDERTSGSGLVSHDLYLHGYFRASIKLPADYTAGVVAFYMSNG
XTH16 DSNVVRSDDGNGVNLDRFTSGSGLVSHDLYLHGYFRASIKLPADYTAGVVAFYMSNG
XTH26 DNNLVIHRDGKTVHLSLDERTSGSGLVSHDLYLHGYFRASIKLPADYTAGVVAFYMSNG
XTH36 TPEACSHCPNSNTITLTFDHRGARGWRTRTFHYGTFSLSIQCPKNTNGLNFNLYLSSSL
XTH42 GASNVKLLANGTMATLADKLSGSGLVSKSSYYGFSAAIKLPAGISSGVVAFYLSNA
XTH43 DNNLVIHRDGKTVHLSLDERTSGSGLVSHDLYLHGYFRASIKLPADYTAGVVAFYMSNG
XTH45 DSNVVRSDDGNGVNLDRFTSGSGLVSHDLYLHGYFRASIKLPADYTAGVVAFYMSNG
XTH58 DNNLVIHRDGKTVHLSLDERTSGSGLVSHDLYLHGYFRASIKLPADYTAGVVAFYMSNG

```

2UWA  $\beta_6$   $\beta_7$   $\beta_8$

110 120 130 140 150 160

```

2UWA QDYPGKHDEIDIEELGTFIPGKPYTLQTNVFIIEGSDYN.IIGREMRHLWFDPTQDFHNY
TmNXG1 QDYPGKHDEIDIEELGTFIPGKPYTLQTNVFIIEGSDYN.IIGREMRHLWFDPTQDFHNY
XTH8 EAHPGFHDEVDIEELGTFIPGKPYTLQTNVYIRGSDG.TIIGREMRHLWFDPTKDFHHY
XTH9 QDHPGKHDEIDIEELGTFIPGKPYTLQTNVYIRGSDG.GNIVGREMRHLWFDPTQDFHNY
XTH20 EAHPGFHDEVDIEELGTFIPGKPYTLQTNVYIRGSDG.QIIGREMRHLWFDPTKDFHHY
XTH23 QDYPGKHDEVDIEELGTFIPGKPYTLQTNVYIRGSDG.KNNVIGREMRHLWFDPTQDFHNY
XTH37 EAHPGFHDEVDIEELGTFIPGKPYTLQTNVYIRGSDG.TIIGREMRHLWFDPTKDFHHY
XTH49 EAHPGFHDEVDIEELGTFIPGKPYTLQTNVYIRGSDG.QIIGREMRHLWFDPTKDFHHY
XTH50 EAHPGFHDEVDIEELGTFIPGKPYTLQTNVYIRGSDG.QIIGREMRHLWFDPTKDFHHY
XTH53 QDYPGKHDEVDIEELGTFIPGKPYTLQTNVYIRGSDG.KNNVIGREMRHLWFDPTQDFHNY
XTH7 E.GEKSDDEIDIEELGKDR..TIVQTNVYFSGNGNK....EKIHLHGFDAADGFHNY
XTH12 DKFPHNHDEIDIEELGKDRNDWVIOQTNVYANGSVST...GREERKPYFDFPTKQYHY
XTH13 DMFQNNHDEIDIEELGNIRGKDRWVIOQTNVYANGSVST...GREERKPYFDFPTKQYHY
XTH16 DVFEKTHDELDIEELGNLAGKWRVIOQTNVYANGSVST...GREERYLWFDPTKDFHHY
XTH26 DMFQNNHDEIDIEELGNIRGKDRWVIOQTNVYANGSVST...GREERYLWFDPTKDFHHY
XTH36 E.GEKSDDEIDIEELGKDR..TIVQTNVYFSGNGNK....EKIHLHGFDAADGFHNY
XTH42 DKFPHNHDEIDIEELGKDRNDWVIOQTNVYANGSVST...GREERKPYFDFPTKQYHY
XTH43 DMFQNNHDEIDIEELGNIRGKDRWVIOQTNVYANGSVST...GREERYLWFDPTKDFHHY
XTH45 DVFEKTHDELDIEELGNLAGKWRVIOQTNVYANGSVST...GREERYLWFDPTKDFHHY
XTH58 DMFQNNHDEIDIEELGNIRGKDRWVIOQTNVYANGSVST...GREERYLWFDPTKDFHHY

```

2UWA  $\beta_9$   $\beta_{10}$   $\beta_{11}$   $\eta_3$   $\beta_{12}$   $\eta_4$   $\eta_5$

170 180 190 200 210 220

```

2UWA AIYWTTPSEIIFVDDVPIRRYPRKSDA..TFPLRPLWVYGSVWDASSWATENGRKYKADYR
TmNXG1 AIYWTTPSEIIFVDDVPIRRYPRKSDA..TFPLRPLWVYGSVWDASSWATENGRKYKADYR
XTH8 AILWSPK...EIPMWWYGSVWDASSWATENGRKYKADYR
XTH9 AILWSPKSETIFVDDVPIRRYPRKSDA..TFPLRPLWVYGSVWDASSWATENGRKYKADYR
XTH20 AILWSPKSETIFVDDVPIRRYPRKSDA..TFPLRPLWVYGSVWDASSWATENGRKYKADYR
XTH23 AILWSPKSETIFVDDVPIRRYPRKSDA..TFPLRPLWVYGSVWDASSWATENGRKYKADYR
XTH37 AILWSPK...EIPMWWYGSVWDASSWATENGRKYKADYR
XTH49 AILWSPK...EIPMWWYGSVWDASSWATENGRKYKADYR
XTH50 AILWTPKEIIFVDDVPIRRYPRKSDA..TFPLRPLWVYGSVWDASSWATENGRKYKADYR
XTH53 AILWTPKEIIFVDDVPIRRYPRKSDA..TFPLRPLWVYGSVWDASSWATENGRKYKADYR
XTH7 IILWSDYVIEWLDIGKVVREKKEGK...FPQKPMFLYASVWDASSWATENGRWAGKYDGS
XTH12 SILWNSYHTVFLVDNIPVREFIH...GTVFPPSKPMSVYATVWDASSWATENGRWAGKYDGS
XTH13 SILWNSYHTVFLVDNIPVREFIH...GTVFPPSKPMSVYATVWDASSWATENGRWAGKYDGS
XTH16 SILWNSYHTVFLVDNIPVREFIH...GTVFPPSKPMSVYATVWDASSWATENGRWAGKYDGS
XTH26 SILWNSYHTVFLVDNIPVREFIH...GTVFPPSKPMSVYATVWDASSWATENGRWAGKYDGS
XTH36 IILWSDYVIEWLDIGKVVREKKEGK...FPQKPMFLYASVWDASSWATENGRWAGKYDGS
XTH42 SILWNSYHTVFLVDNIPVREFIH...GTVFPPSKPMSVYATVWDASSWATENGRWAGKYDGS
XTH43 SILWNSYHTVFLVDNIPVREFIH...GTVFPPSKPMSVYATVWDASSWATENGRWAGKYDGS
XTH45 SILWNSYHTVFLVDNIPVREFIH...GTVFPPSKPMSVYATVWDASSWATENGRWAGKYDGS
XTH58 SILWNSYHTVFLVDNIPVREFIH...GTVFPPSKPMSVYATVWDASSWATENGRWAGKYDGS

```

$\beta 13$   $\alpha 2$   
 2UWA  $\alpha$   $\rightarrow$  TT TT  $\alpha 2$   
 230 240 250 260 270  
 2UWA YQPFVGGKYEEDFKLGSCTVEAA.SSCNPA SV.....SP..YGO LSSQQVAAAEWVQK  
 TmNXG1 YQPFVGGKYEDFKLGSCTVEAA.SSCNPA SV.....SP..YGO LSSQQVAAAEWVQK  
 XTH8 YQPFVARYTNFKASGCSAYAS.RWCHPV SA.....SPYRSGGLTRQOYVAMRWVQR  
 XTH9 YQPFVARYTNFKASGCSAYAS.RWCHPV SA.....SPYRSGGLTRQOYVAMRWVQR  
 XTH20 YQPFVARYTNFKASGCSAYAS.RWCHPV SA.....SPYRSGGLTRQOYVAMRWVQR  
 XTH23 YQPFVARYTNFKASGCSAYAS.RWCHPV SA.....SPYRSGGLTRQOYVAMRWVQR  
 XTH37 YQPFVARYTNFKASGCSAYAS.RWCHPV SA.....SPYRSGGLTRQOYVAMRWVQR  
 XTH49 YQPFVARYTNFKASGCSAYAS.RWCHPV SA.....SPYRSGGLTRQOYVAMRWVQR  
 XTH50 YQPFVARYTNFKASGCSAYAS.RWCHPV SA.....SPYRSGGLTRQOYVAMRWVQR  
 XTH53 YQPFVARYTNFKASGCSAYAS.RWCHPV SA.....SPYRSGGLTRQOYVAMRWVQR  
 XTH7 DAPYVCLYKDIHVPTSTAVK.....SPPGYNSLSPPQYNAQWVQN  
 XTH12 YAPFVVSFSEMQLAGCTS DPLACSKSTPSS...GVDPVNGPQFTKLSPPQMAALDWARK  
 XTH13 YAPYVAEFSDLVLHGCAVDPIEH.EAKD.....NAQTSKAVPTGVTPAQRICKMENFRK  
 XTH16 YAPFVAEFKDLVLKGCSDVPIEESTVAGRSICSDQHADLEAQDYAAVTPRRRLAMRRFRQ  
 XTH26 YAPYVAEFSDLVLHGCAVDPIEENAMCN.....NAQNSKAN...IIPKHKIKMENFRN  
 XTH36 DAPYVCLYKDIHVPTSTAVK.....SPPGYNSLSPPQYNAQWVQN  
 XTH42 YAPFVVSFSEMQLAGCTS DPLACSKSTPSS...GVDPVNGPQFTKLSPPQMAALDWARK  
 XTH43 YAPYVAEFSDLVLHGCAVDPIEH.EAKD.....NAQTSKAVPTGVTPAQRICKMENFRK  
 XTH45 YAPFVAEFKDLVLKGCSDVPIEESTVAGRSICSDQHADLEAQDYAAVTPRRRLAMRRFRQ  
 XTH58 YAPYVAEFSDLVLHGCAVDPIEENAMCN.....NAQNSKAN...IIPKHKIKMENFRN  
1 1

$\beta 14$   $\eta 6$   $\eta 7$   
 2UWA  $\alpha$   $\rightarrow$  TT TT  
 280 290  
 2UWA NYM VYNYC D D P T R D H T L T P E C .....  
 TmNXG1 NYM VYNYC D D P T R D H T L T P E C .....  
 XTH8 H H M V Y N Y C Q D P K R D H R L T P E C W G K K K E N N E K R M R S R G V V I V H I Y A S Y F I I L L L T V S S E T F  
 XTH9 H Y L V Y Y Y C H D P K R D H R L T P E C .....  
 XTH20 Y H M V Y N Y C Q D S K R D H R L T P E C W S .....  
 XTH23 N Y L V Y D Y C R D P T R D H T L T P E C .....  
 XTH37 H H M V Y N Y C Q D P K R D H R L T P E C W G K K K E N N E K R M R S R G V V I V H I Y A S Y F I I L L L T V S S E T F  
 XTH49 H H M V Y N Y C Q D P K R D H R L T P E C W G .....  
 XTH50 Y H M V Y N Y C Q D S K R D H R L T P E C W S .....  
 XTH53 N Y L V Y D Y C R D P N R D H T L T P E C .....  
 XTH7 .....  
 XTH12 K L M F Y S Y C T D K N R Y K V M P P E C H .....  
 XTH13 K H M T Y S Y C Y D K V R Y K V P P T E C V I N P Q E A E R L R K F D P V T F G G G R R R H G . . . K R H Y R S R G S Q  
 XTH16 R Y M Y Y S Y C Y D T L R Y P N P L P E C D I P S E K Q R F K E T G R L K F G G S H R R Q S R R K G R T T P V D D T  
 XTH26 N H M T Y S Y C Y D R A R Y Q V P P P E C V I S L Q E A E A L R K L D P A T F G G G R R R H R G G G K R R H H Q S K G R K  
 XTH36 .....  
 XTH42 K L M F Y S Y C T D K N R Y K V M P P E C H .....  
 XTH43 K H M T Y S Y C Y D K V R Y K V P P T E C L I N P Q E A E R L R K F D P V T F G G G R R R H G . . . K R H Y R S R G S Q  
 XTH45 R Y M Y Y S Y C Y D T L R Y P N P L P E C D I P S E K Q R F K E T G R L K F G G S H R R Q S R R K G R T T P V D D T  
 XTH58 N H M T Y S Y C Y D R A R Y Q V P P P E C V I S L Q E A E A L R K L D P A T F G D G R R R H R G G G K R R H H Q S K G R K  
2 2

2UWA  
 2UWA .....  
 TmNXG1 .....  
 XTH8 QLVSFISFTPRNLQVQN  
 XTH9 .....  
 XTH20 .....  
 XTH23 QLVSFISFTPRNLQVQN  
 XTH37 .....  
 XTH49 .....  
 XTH50 .....  
 XTH53 .....  
 XTH7 .....  
 XTH12 .....  
 XTH13 AEEAAAF.....  
 XTH16 DQGDM.....  
 XTH26 AEDASF.....  
 XTH36 .....  
 XTH42 .....  
 XTH43 AEEAAAF.....  
 XTH45 DQGDM.....  
 XTH58 AEDASF.....

## Supplementary Files 6 The multiple alignment of amino acid sequences among 58 AhXTHs in peanut and 2UWA

Amino acid sequences from 58 AhXTHs in peanut were aligned using TmNXG1(2UWA) as a referent sequence by MEGA X, and their secondary structures were predicted using ESPript. The conserved residues were shown in blue frames.
