# Supplementary material for: Genome-wide identification of xyloglucan endotransglucosylase/hydrolase gene family members in peanut and their expression profiles during seed germination
Source: PeerJ journal article supplement (doi:10.7717/peerj.13428), 2022-05-17

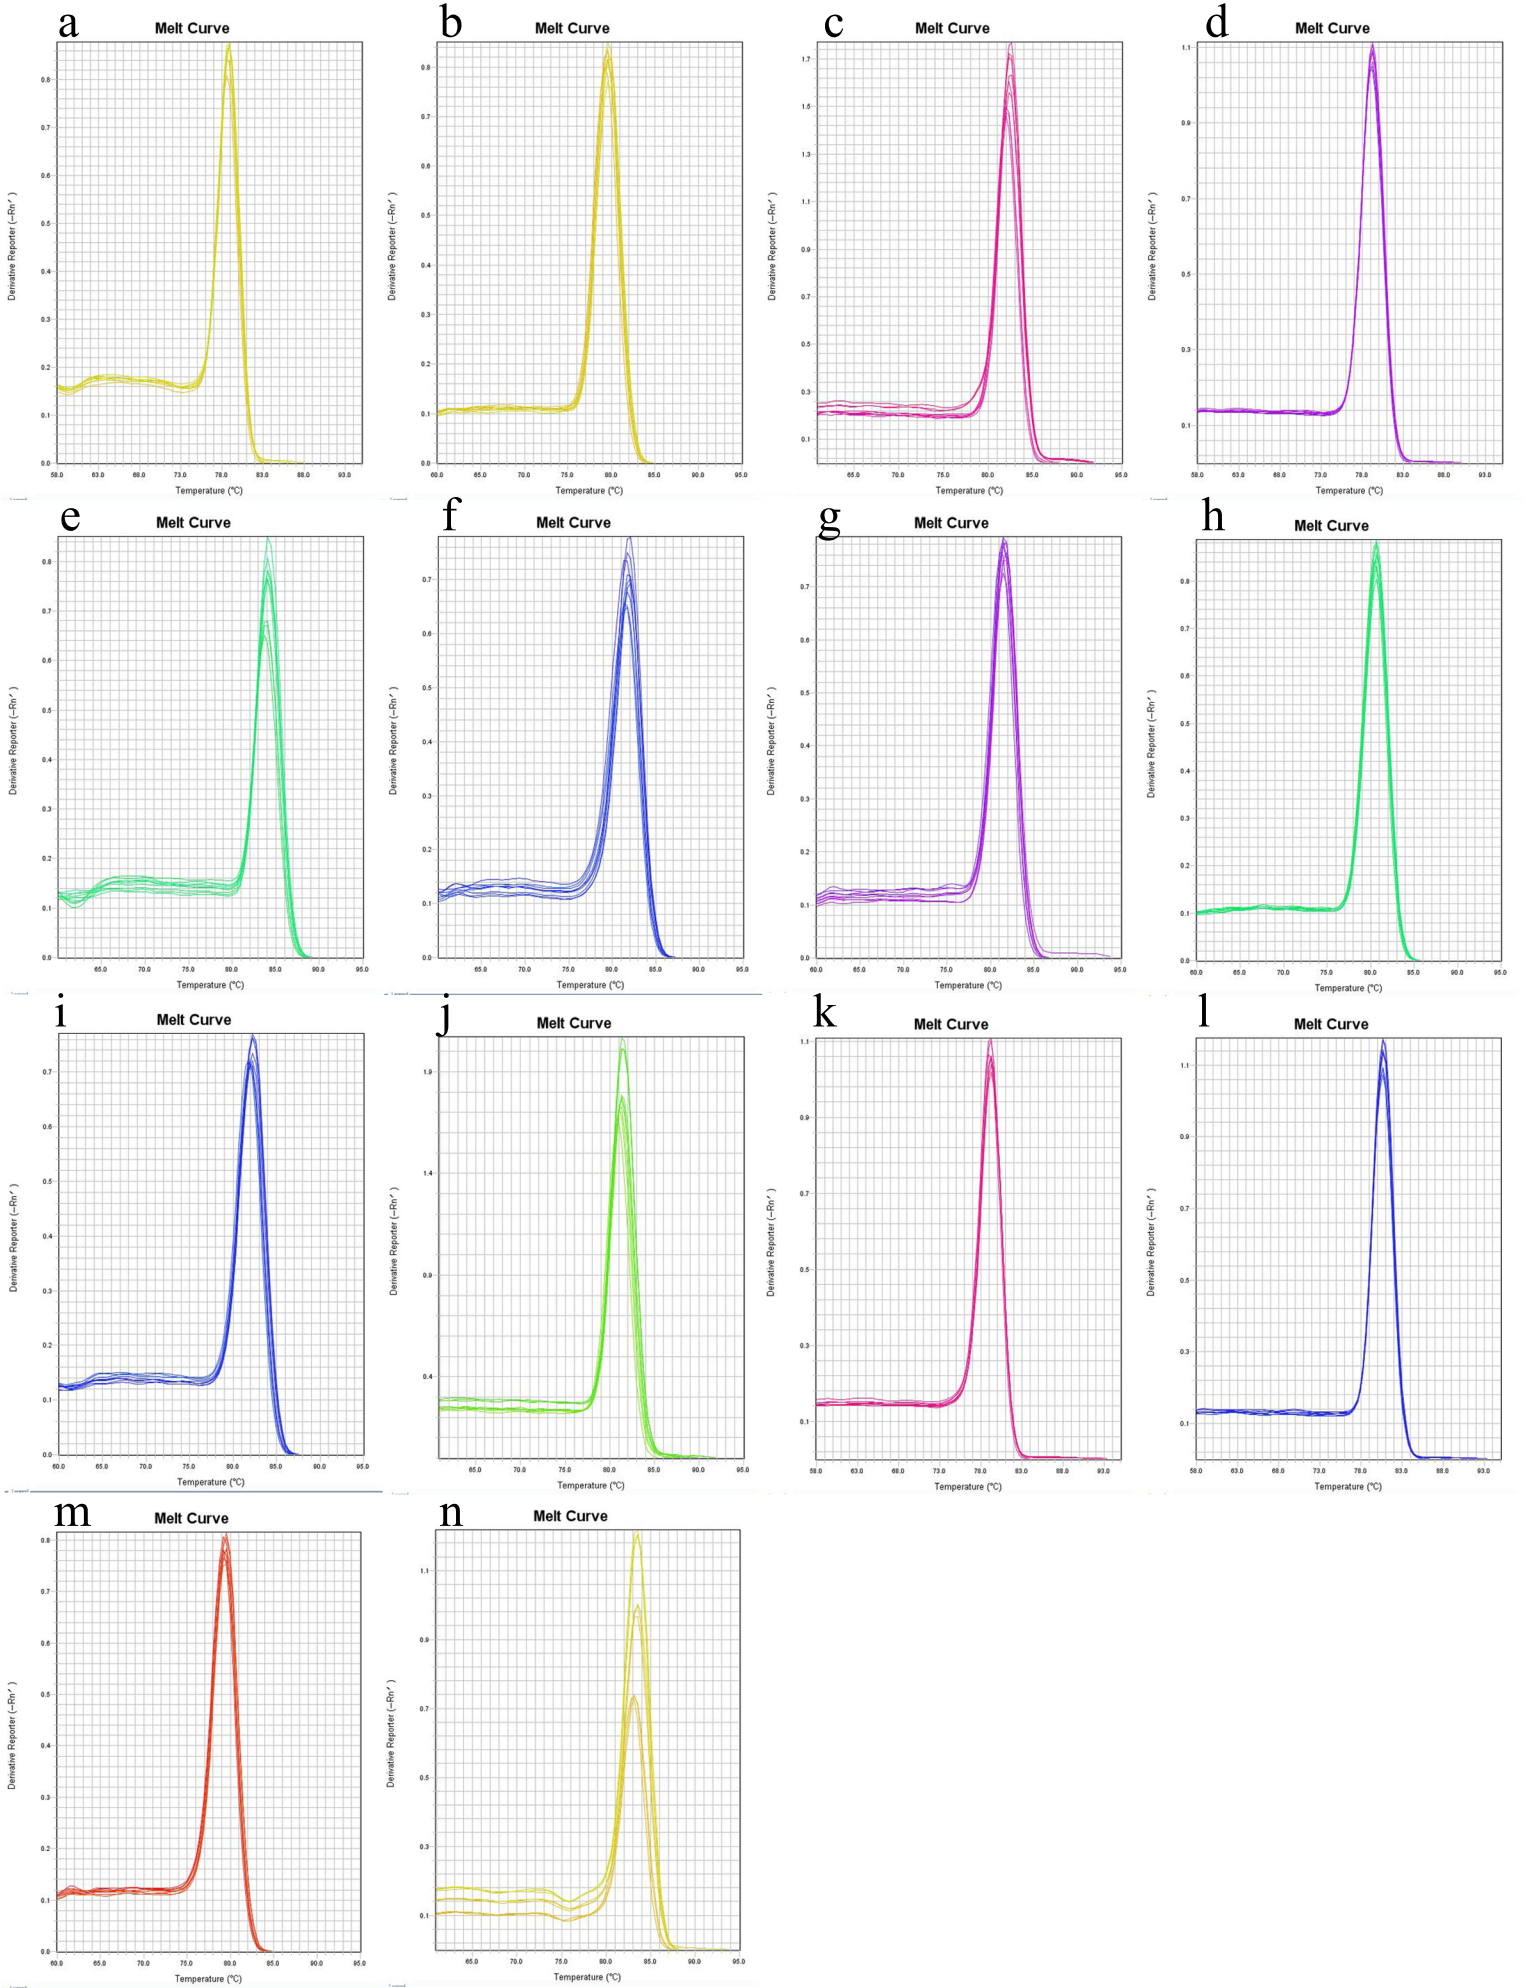

Supplement: Supplementary_File_10.pdf [file Supplementary_File_10.pdf]
