# Supplementary material for: Genome-wide identification of xyloglucan endotransglucosylase/hydrolase gene family members in peanut and their expression profiles during seed germination
Source: PeerJ journal article supplement (doi:10.7717/peerj.13428), 2022-05-17

2K

1

2K

2

2000bp

2000bp

750bp

750bp

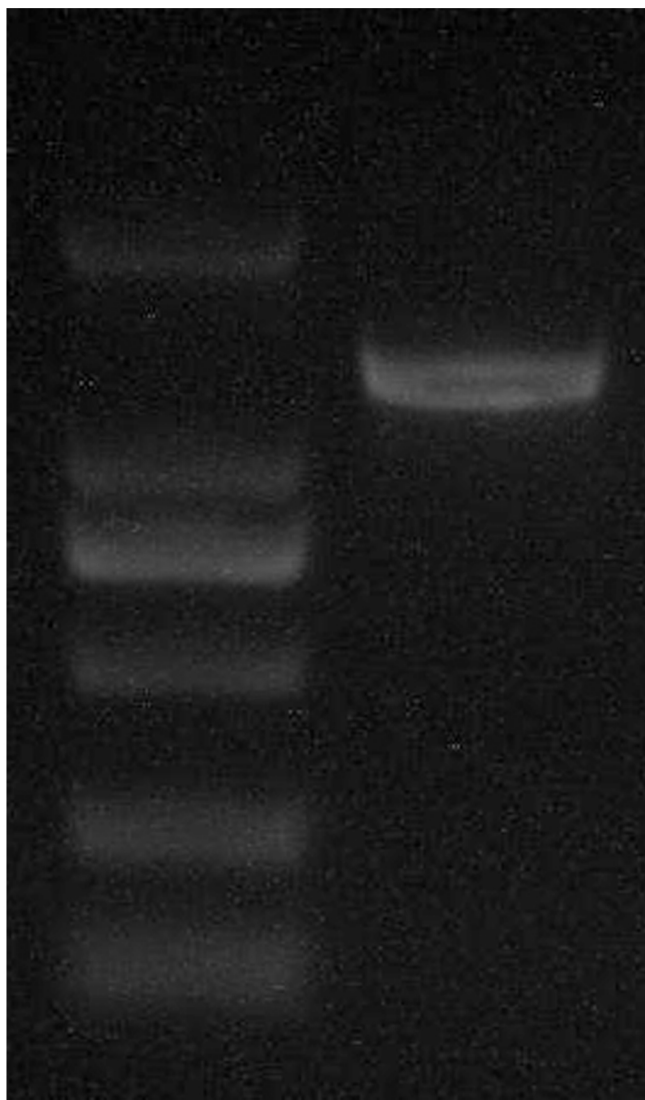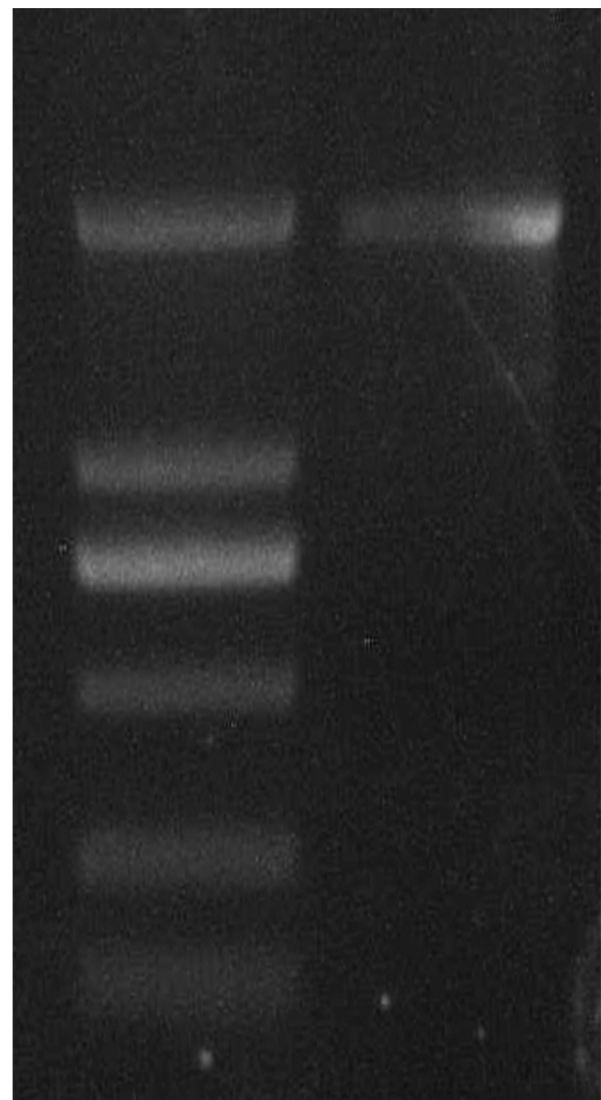

Supplement: Supplementary_File_11.pdf [file Supplementary_File_11.pdf]
